# Supplementary material for: Smectic liquid crystal polymers as a template for ultrathin CaCO3 nanolayers
Source: Royal Society of Chemistry journal article supplement (doi:10.1039/c5ra27752c), 2016-01-01
Supplement: c5ra27752c1.pdf [file c5ra27752c1.pdf]

---

## Electronic Supplementary Information

### Smectic liquid crystal polymers as a template for ultrathin CaCO<sub>3</sub> nanolayers

Yifei Xu,<sup>a,b</sup> Huub P. C. van Kuringen,<sup>c,d</sup> Dirk J. Mulder,<sup>c,d</sup> Albertus P. H. J. Schenning<sup>\*c,e</sup>  
and Nico Sommerdijk<sup>\*a,e</sup>

*a. Laboratory of Materials and Interface Chemistry & Center of Multiscale Electron  
Microscopy, Department of Chemical Engineering and Chemistry, Eindhoven  
University of Technology, PO box 513, 5600 MB, Eindhoven, The Netherlands.*

*Email: n.sommerdijk@tue.nl, Tel. +31(0)402475870*

*b. National Laboratory of Solid State Microstructures and School of Physics, Nanjing  
University, Hankou Rd.22, 210093, Nanjing, China.*

*Tel. +86(0)2583592756, Fax. +86(0)25835925535*

*c. Laboratory for Functional Materials and Devices, Department of Chemical  
Engineering and Chemistry, Eindhoven University of Technology, PO box 513, 5600,  
MB, Eindhoven, The Netherlands. Email: A.P.H.J.Schenning@tue.nl*

*d. Dutch Polymer Institute (DPI) P.O. Box 902, 5600 AX Eindhoven, The  
Netherlands*

*e. Institute for Complex Molecular Systems, Eindhoven University of Technology,  
PO box 513, 5600 MB, Eindhoven, The Netherlands.*

---

## Experimental Section

### *Materials*

The hydrogen bridged 4-(6-acryloyloxyhexyloxy)benzoic acid (6OBA) and the liquid crystalline crosslinker, 4-((4-(6-(acryloyloxy)hexyloxy)phenoxy)carbonyl)phenyl 4-(6-(acryloyloxy)hexyloxy) (C6H) were both custom made by Synthron Chemicals, Germany. Initiator 1-hydroxycyclohexylphenylketone (Irgacure 184) was supplied by Ciba Specialty Chemicals. Analytical grade  $\text{CaCl}_2$ ,  $(\text{NH}_4)_2\text{CO}_3$ , inhibitor p-methoxyphenol and poly-( $\alpha,\beta$ )-DL-aspartic acid sodium salt (pAsp, mw=2000~11000) were purchased from Aldrich.

### *Preparation of smectic liquid crystal membrane*

A LC mixture was made with the hydrogen bridged 6OBA, and the covalently bonded crosslinker C6H in a 90/10 w/w ratio. In order to make the mixture accessible for photopolymerization, 0.5 wt% 1-hydroxycyclohexylphenylketone was added as photoinitiator. For stabilization, 0.1 wt% of p-methoxyphenol was added as thermal polymerization inhibitor. The mixture was dissolved in tetrahydrofuran1, which was subsequently evaporated at 50 °C for approximately 1 hour. Films with a thickness that varied between 15 and 20  $\mu\text{m}$  were made by processing the mixture in the melt at 105 °C by capillary suction between two accurately spaced glass plates. The photopolymerization in the smectic state of the monomers was performed at 95 °C for 5 min with a mercury lamp (Omnicure s1000) at the intensity of approximately 5  $\text{mW cm}^{-2}$  at the sample surface followed by a heat treatment at 135 °C to ensure maximum conversion of the acrylate groups.

### *Infiltration of $\text{CaCO}_3$ nanolayers*

The as-prepared polymer networks were cut in smaller flakes of approximately 0.5  $\times$  0.5 cm and immersed in 0.05 M KOH solution for 30 min to break up the hydrogen bridges and open the nanogaps. They were quickly washed with a few milliliters of distilled water to remove the residual base and, subsequently, immersed in 10 mM  $\text{CaCl}_2$  solutions with 25 or 100 mg/l pAsp. The pH value of the solution was adjusted to 9 by 0.1 M KOH solution in order to keep the nanogaps open. The solutions were sealed with parafilm and standstill for 24 h at room-temperature. After that, the solutions were placed into a desiccator, and several needle holes were made on the parafilm cover. A vial of  $(\text{NH}_4)_2\text{CO}_3$  powder with holey cover was placed near the solutions. The  $\text{CO}_2/\text{NH}_3$  mixture gas released by  $(\text{NH}_4)_2\text{CO}_3$  was slowly diffused into the solutions at room-temperature to induce the  $\text{CaCO}_3$  formation. The pH value is constant at  $\sim 10$  during the reaction. After growth, the membranes are quickly washed by deionized water and dried by filter paper.

### *Characterization*

POM studies were conducted using a Leica CTR 6000 microscope. FTIR spectra were obtained using a FTS 6000 Spectrometer from Bio-Rad equipped with Specac Golden gate diamond ATR and were signal-averaged over 50 scans at a resolution of 4  $\text{cm}^{-1}$ .

For TEM observations the membranes were embedded in EMS EPO-FIX cold-setting embedding resin and cured at 70 °C. The embedded sample was cross cut using a Reichert-Jung Ultracut-E ultramicrotome with 70 nm setting thickness. The cross sections were transferred on a carbon film on a 200 square mesh copper grid. TEM imaging was performed under slight defocus on a FEI-Titan TEM equipped with a field emission gun (FEG) and operating at 300 kV. Images were recorded using a 2k × 2k Gatan CCD camera equipped with a post column Gatan Energy Filter (GIF).

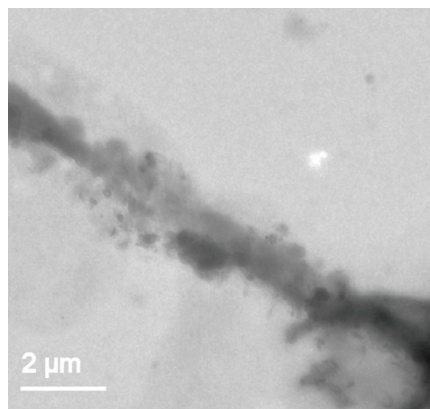

Figure S1. Low magnification TEM images of microtomed thin sections from the sample grown in the presence of 25 mg/l pAsp for 24 h, showing a  $\sim 1 \mu\text{m}$  thick band with increased contrast, which corresponds to the mineralized membrane surface.

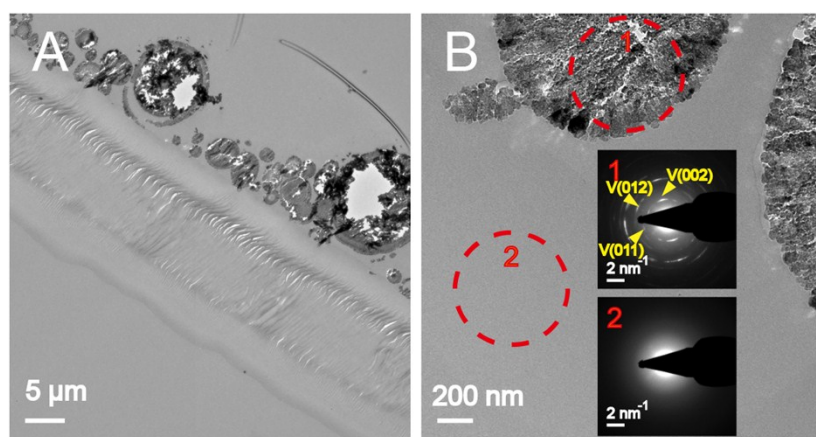

Figure S2. TEM images of microtomed thin sections showing the region covered by large  $\text{CaCO}_3$  particles in the sample grown in the presence of 25 mg/l pAsp for 24 h. (A) low magnification image. (B) shows a zoom-in image of (A). Two areas at the  $\text{CaCO}_3$  particle and the membrane are highlighted by red dash line circles 1 and 2, respectively. Insets: SAED patterns corresponding to circle 1 and 2 showing that the diffraction pattern of the  $\text{CaCO}_3$  particle corresponds to crystalline vaterite (indexed by “V”), while no  $\text{CaCO}_3$  infiltration could be observed in the membrane below.

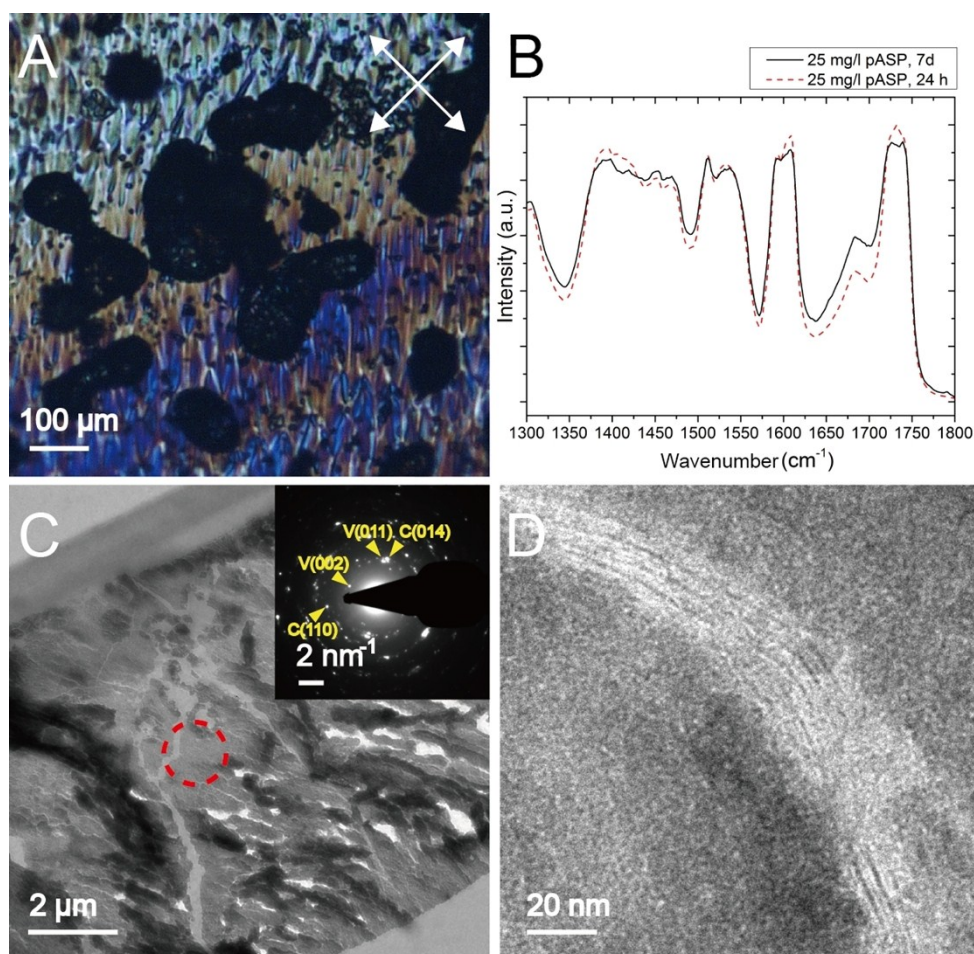

Figure S3. Analysis of the sample grown with 25 mg/l pASP for 7 d. (A) shows the POM image with polarizer directions indicated by white arrows. The membrane is covered by more and larger  $\text{CaCO}_3$  particles, and the obvious colourful features indicate enhanced birefringence. (B) shows the FTIR spectrum, with the spectrum of 25 mg/l pASP, 24 h sample as comparison. The enhanced peak at  $1675 \text{ cm}^{-1}$  indicates that more H-bonds are recovered after 7d. (C, D) TEM images of the mitrotomed thin section. (C) shows the membrane is fully infiltrated by  $\text{CaCO}_3$ . The inset shows the SAED pattern of the area within the red dash line circle, indicating the nanoporous polymer is infiltrated by a mixture calcite and vaterite crystals (index by "C" or "V" spots, respectively) with no preferential alignment. (D) shows a zoom-in image of (C), indicating the nanolayer structures.
